# Supplementary material
Source: PubMed Central journal article supplement (PMC8922250)
Supplement: EMBJ-41-e109102-s002.pdf [file EMBJ-41-e109102-s002.pdf]

## **APPENDIX**

### **PHR1 suppresses plant immunity to shape root microbiome through the RALF- FERONIA complex under Pi starvation**

**Appendix Table of Contents**

**Appendix Figure S1-S11**

**Appendix Table S1**

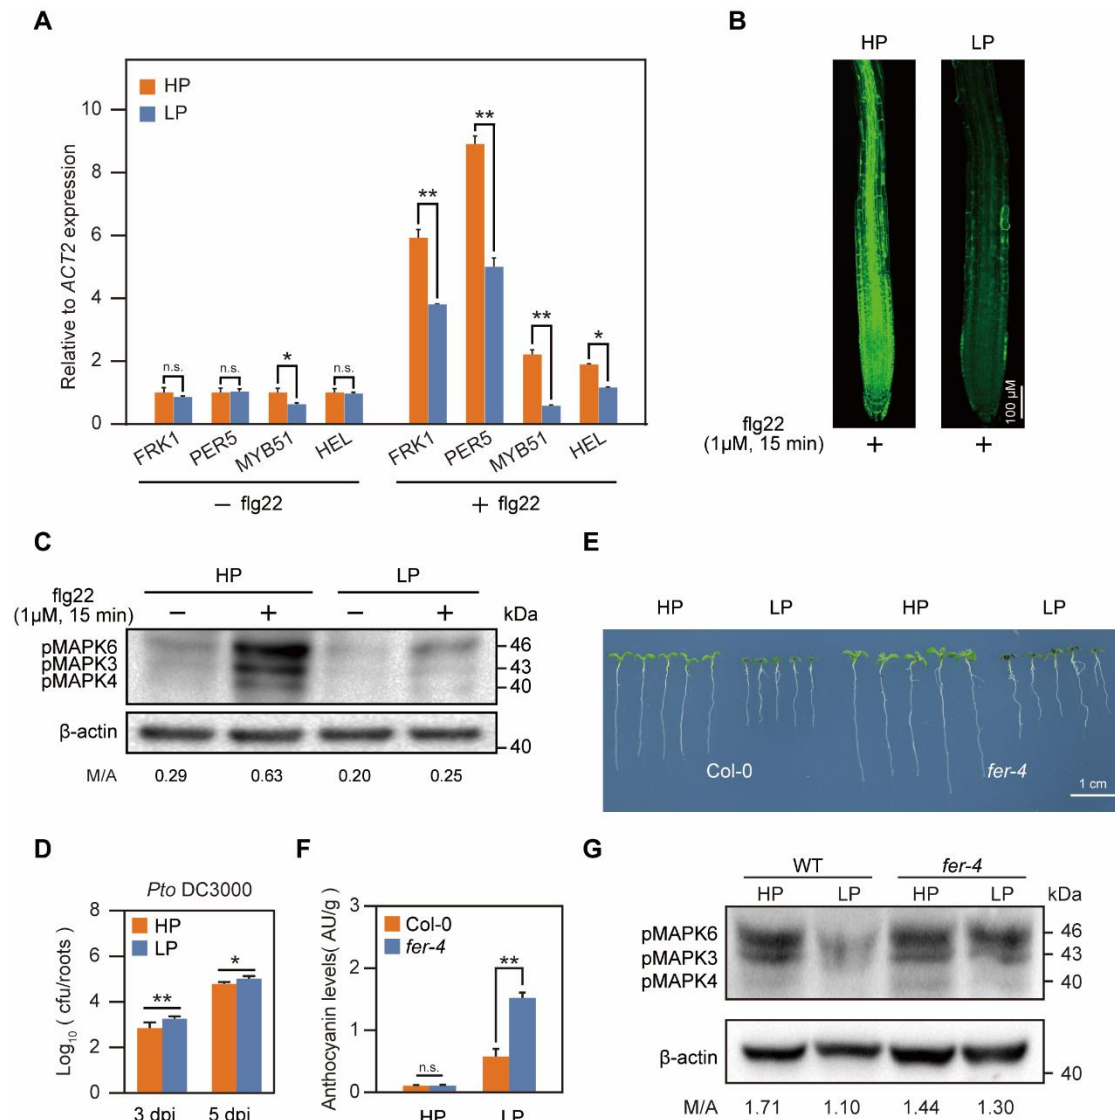

**Appendix Figure S1. The PSR negatively regulates the immune response of *Arabidopsis*.**

(A) The PSR inhibits flg22-induced MAMP-responsive gene expression. WT (Col-0) seedlings grown in either HP or LP media were treated with water or flg22 for 15 mins. Roots were harvested, and the relative expression of MAMP-responsive genes was quantified via RT-qPCR. The data shown indicate the means  $\pm$  SDs ( $n = 3$ ,  $n$  refers to technical replicates); n.s., not significant; \*,  $p < 0.05$ ; \*\*,  $p < 0.01$  (Student's  $t$  test).

(B) The PSR inhibits flg22-induced ROS production in WT (Col-0) roots. WT seedlings grown in either HP or LP media were treated with flg22 for 15 mins. Roots were harvested and stained with H<sub>2</sub>DCFDA.

(C) The PSR inhibits flg22-induced MAPK activation. WT (Col-0) seedlings grown in either HP or LP media were treated with water or flg22 for 15 mins. Roots were

harvested, and MAPK levels were determined with anti-pMAPK.  $\beta$ -actin was used as a loading control.

**(D)** Growth of *Pto* DC3000 in WT (Col-0) under Pi-starvation conditions. Seedlings grown in either HP or LP media were inoculated (by soaking) with bacterial suspension ( $OD_{600} = 0.2$ ) for 2 min, and the number of bacteria from individual root was quantified at 3 days and 5 days after inoculation (dpi), respectively. The data shown indicate the means  $\pm$  SDs ( $n=18$ ,  $n$  refers to the number of roots per group); The  $p$  value is for the statistical difference of the log (cfu/root) between HP and LP. \*,  $p < 0.05$ ; \*\*,  $p < 0.01$  (Student's  $t$  test).

**(E)** Phenotype of *Arabidopsis* under Pi-starvation conditions. WT (Col-0) and *fer-4* mutants was first grown in 1/2-strength MS media for 3 days and then transplanted to either 1/2-strength MS media consisting of 1.25 mM Pi (HP) or low-Pi media consisting of 10  $\mu$ M Pi (LP) for another 5 days.

**(F)** Anthocyanin levels were measured spectrophotometrically at 530 and 657 nm. The concentration of anthocyanins was calculated using the formula  $A_{530} - 0.25 \times A_{657}$ . The data shown indicate the means  $\pm$  SDs ( $n = 3$ ,  $n$  refers to technical replicates); n.s., not significant; \*\*,  $p < 0.01$  (Student's  $t$  test).

**(G)** MAPK activation in WT (Col-0) and *fer-4* mutant roots. Seedlings grown in either HP or LP media for 5 days and roots were harvested. The MAPK level was determined with anti-pMAPK, and  $\beta$ -actin was used as a loading control.

Data information: All experiments were repeated three times with similar results.

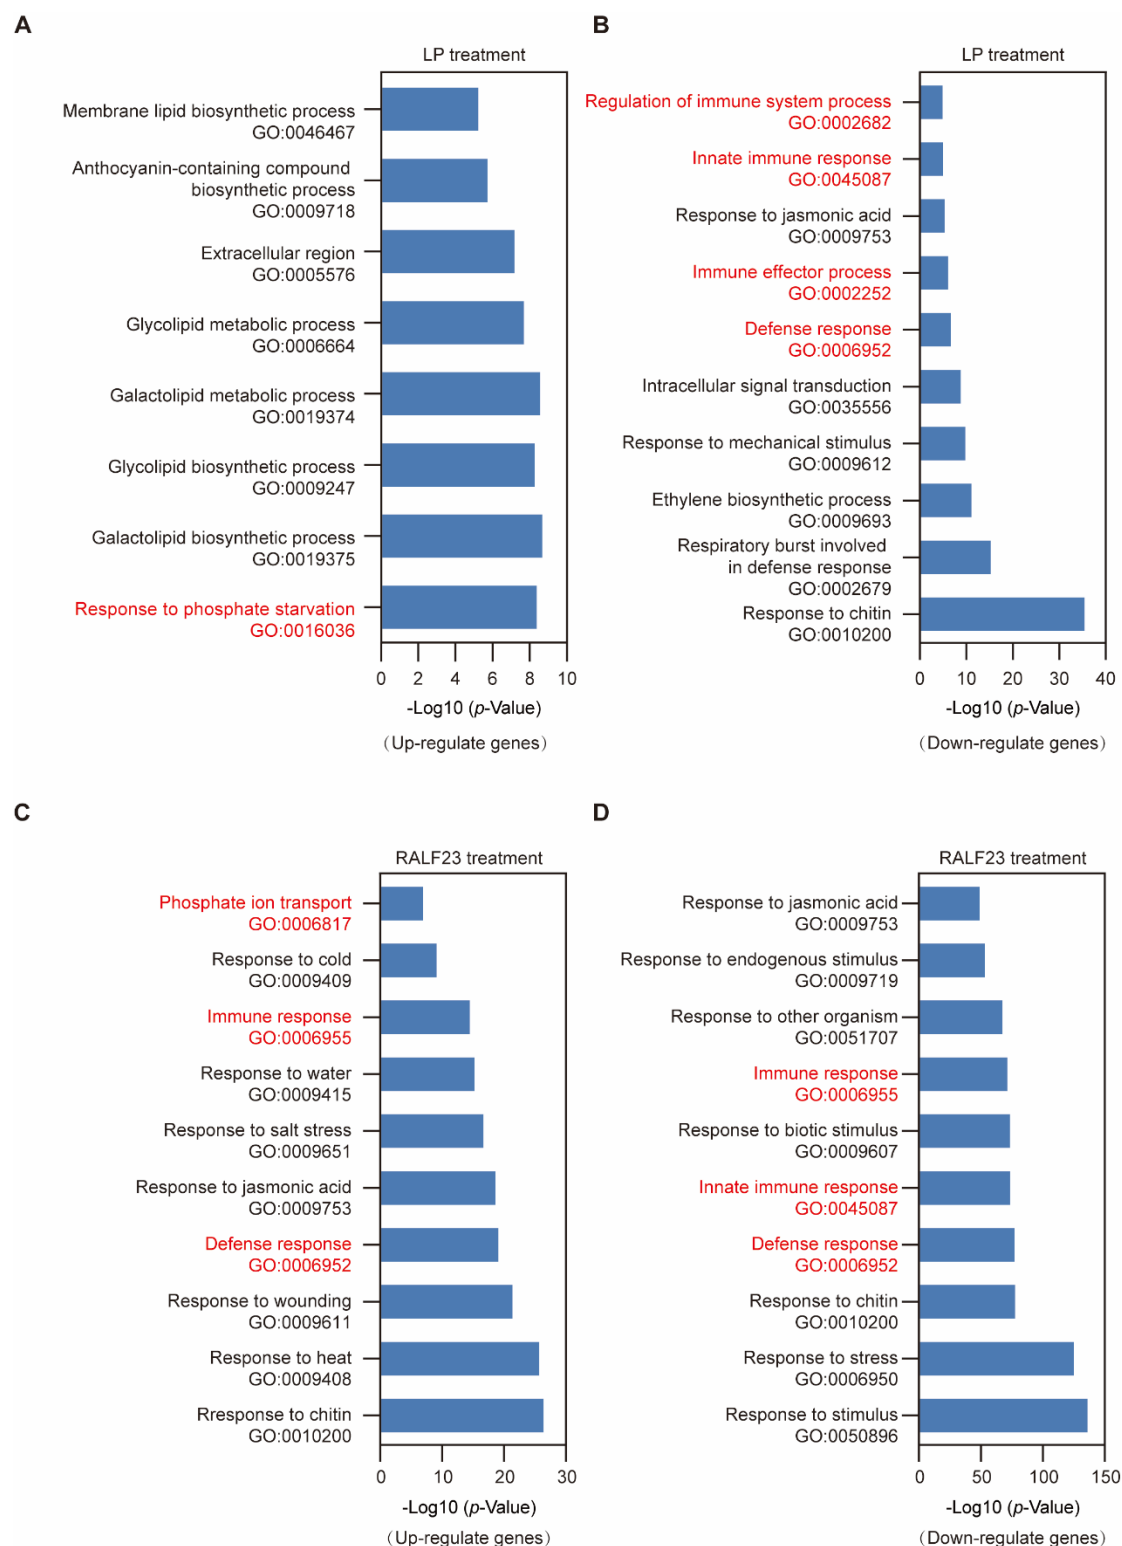

**Appendix Figure S2. The GO enrichment analysis of differentially expressed genes after Pi-stress or RALF23 treatment.**

(A-B) GO enrichment analysis of (A) up-regulated genes and (B) down-regulated genes after Pi-starvation.

(**C-D**) GO enrichment analysis of (**C**) up-regulated genes and (**D**) down-regulated genes after RALF23 treatment.

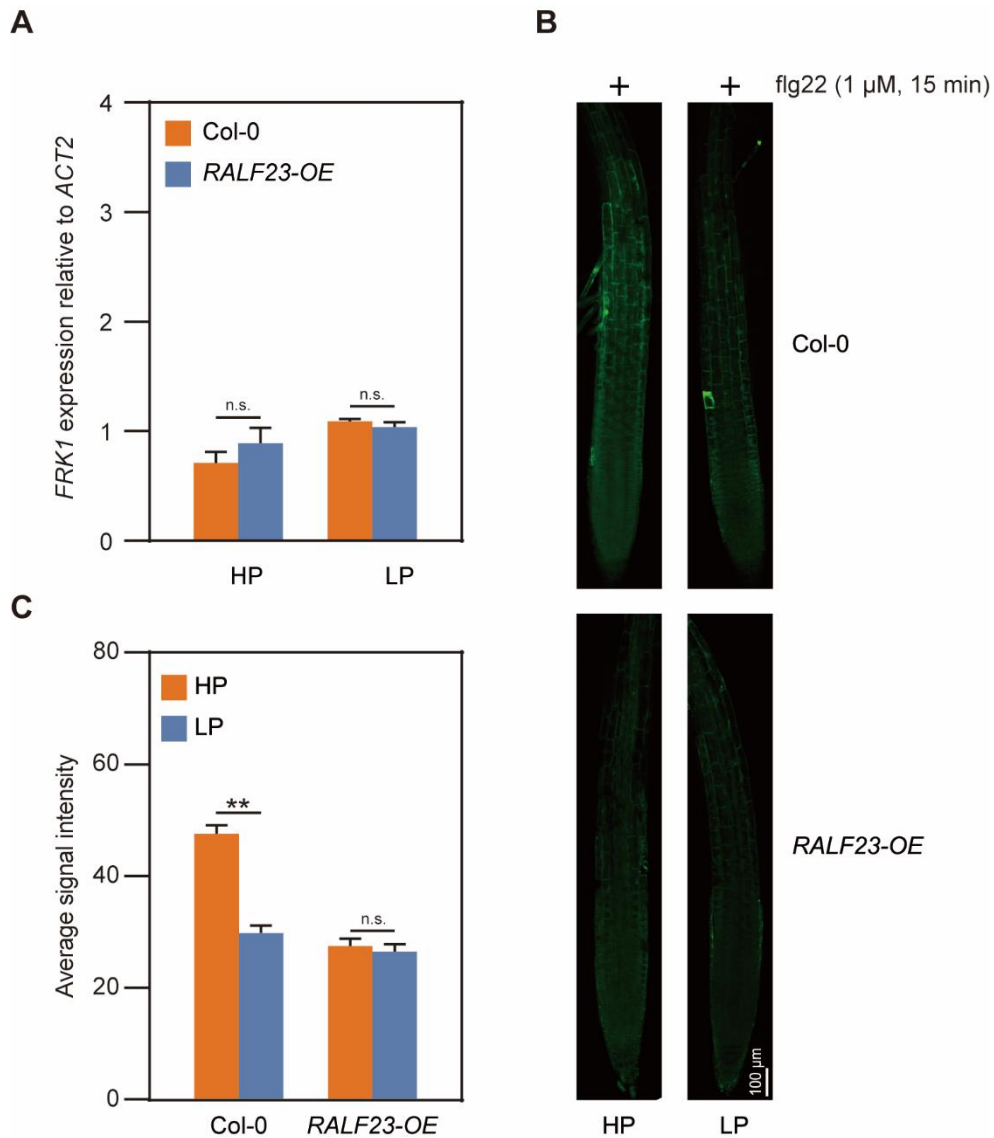

**Appendix Figure S3. *RALF23* suppresses flg22-induced immunity.**

(A) *FRK1* expression in Col-0 and *RALF23-OE* roots. Seedlings first grown in 1/2-strength MS media for 3 days and then transplanted to either HP or LP media for 5 days and roots were harvested. The relative expression of *FRK1* was quantified via RT-qPCR. The data shown indicate the means  $\pm$  SDs ( $n = 3$ ,  $n$  refers to technical replicates); n.s., not significant (Student's  $t$  test).

(B) flg22-induced ROS production in Col-0 and *RALF23-OE* roots. Seedlings grown in either HP or LP media were treated with 1  $\mu$ M flg22 for 15 mins. Roots were harvested and stained with H<sub>2</sub>DCFDA. One representative root was shown.

(C) Average H<sub>2</sub>DCFDA signal intensity in roots shown in (B). The fluorescence intensity was quantified with ImageJ. The data shown indicate the means  $\pm$  SDs ( $n =$

30, n refers to the number of roots per group); n.s., not significant; \*\*,  $p < 0.01$  (Student's  $t$  test).

Data information: All experiments were repeated three times with similar results.

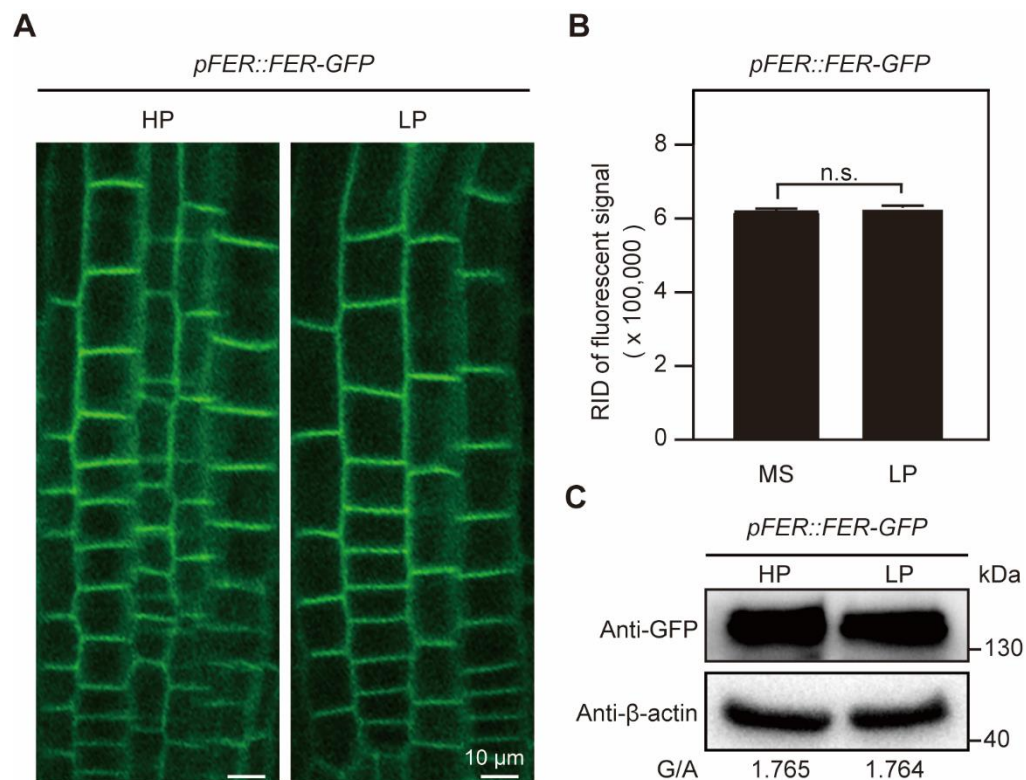

**Appendix Figure S4. FER expression in response to Pi starvation.**

(A-B) Fluorescence intensity of FER during the PSR. Native promoter-driven and GFP-labelled FER transgenic *Arabidopsis* lines (*pFER::FER-GFP*) grown in either HP or LP media for 5 days. (A), The fluorescence was checked in the root tip. (B), The fluorescence intensity was quantified with ImageJ. The data shown indicate the means  $\pm$  SDs ( $n = 30$ ,  $n$  refers to the number of roots per group); n.s., not significant (Student's *t* test).

(C) FER protein accumulation under LP conditions. *pFER::FER-GFP* transgenic seedlings were grown in either HP or LP media for 5 days. FER protein levels were determined with anti-GFP, and  $\beta$ -actin was used as a loading control.

Data information: All experiments were repeated three times with similar results.

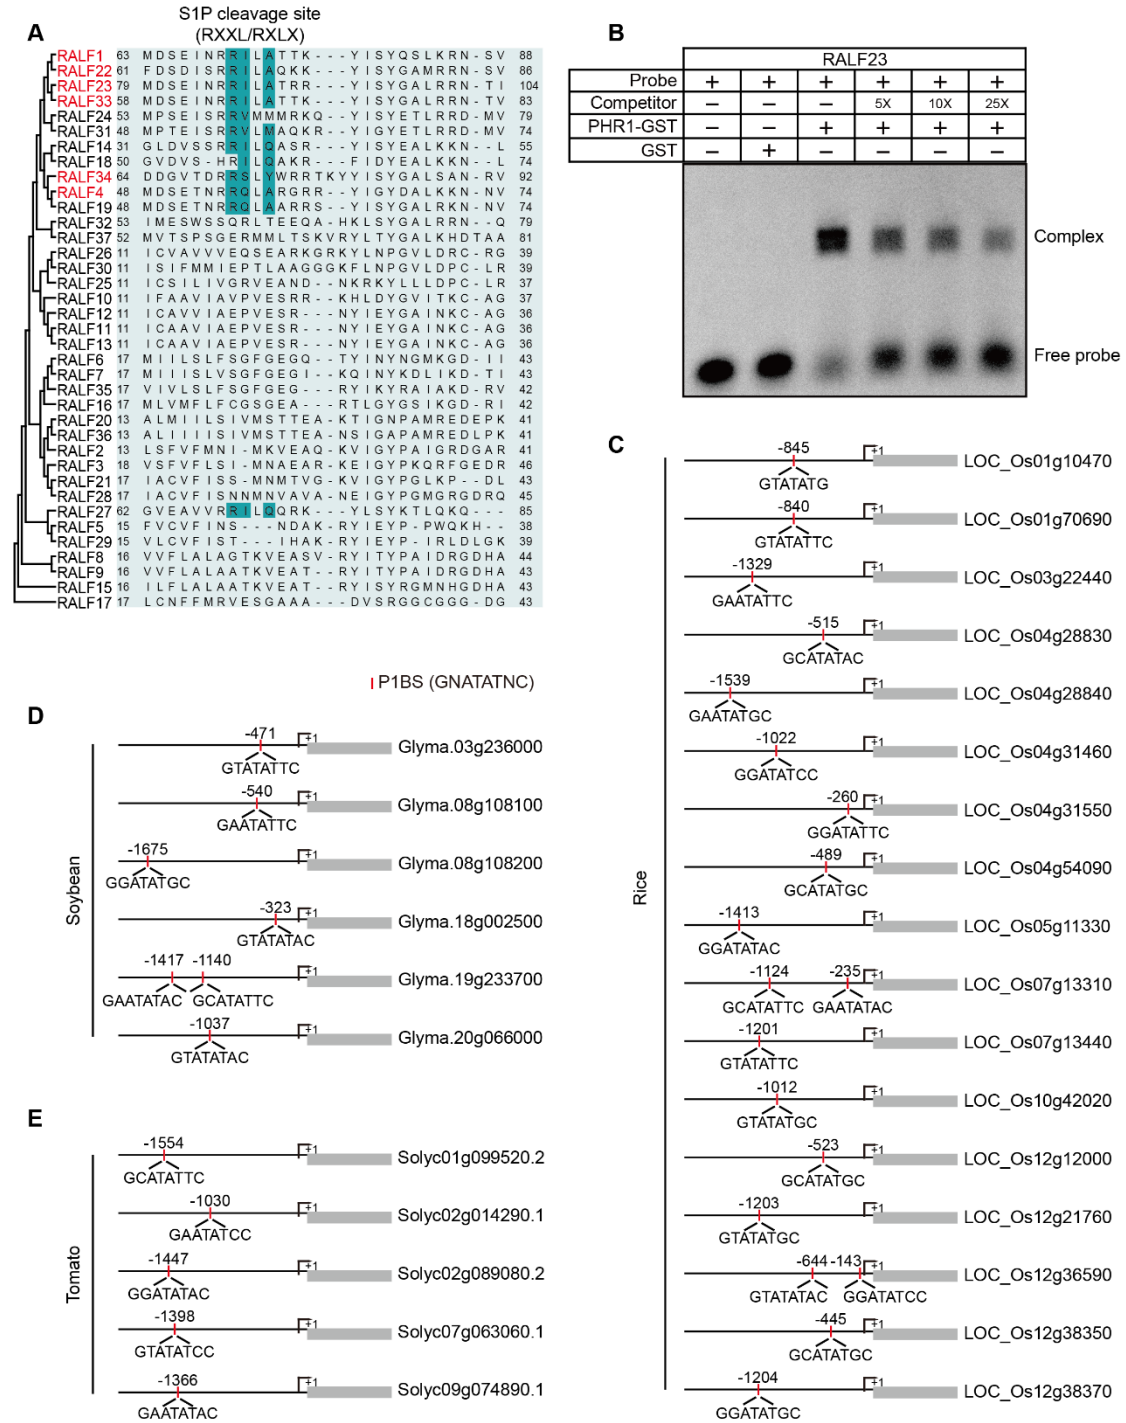

**Appendix Figure S5. PHR1 directly binds to *RALF23* *in vitro*.**

(A) Alignment of 37 *Arabidopsis* RALF peptide sequences surrounding the propeptide-peptide transition site. The key residues arginine (R) and leucine (L) needed for S1P recognition are highlighted in green (conserved motif: RXLX/RXXL). RALF peptides that have the S1P recognition motif are highlighted in red, and those RALFs are likely to be cleaved by S1P and bound by PHR1. A phylogenetic analysis of all RALF

members is shown on the left.

**(B)** PHR1 binds to *RALF23* *in vitro*. Competitive EMSA showing that the interaction between PHR1 and *RALF23* was probed with fluorescent isothiocyanate (FITC)-labelled DNA directly. Unlabeled probe was used as a competitor. Experiments were repeated three times with similar results.

**(C-E)** PHR1-binding site (P1BS, GNATATNC) prediction within 2000 bp of certain RALF promoters in rice (**C**), soybean (**D**), and tomato (**E**). The positions are relative to the start codon (+1).

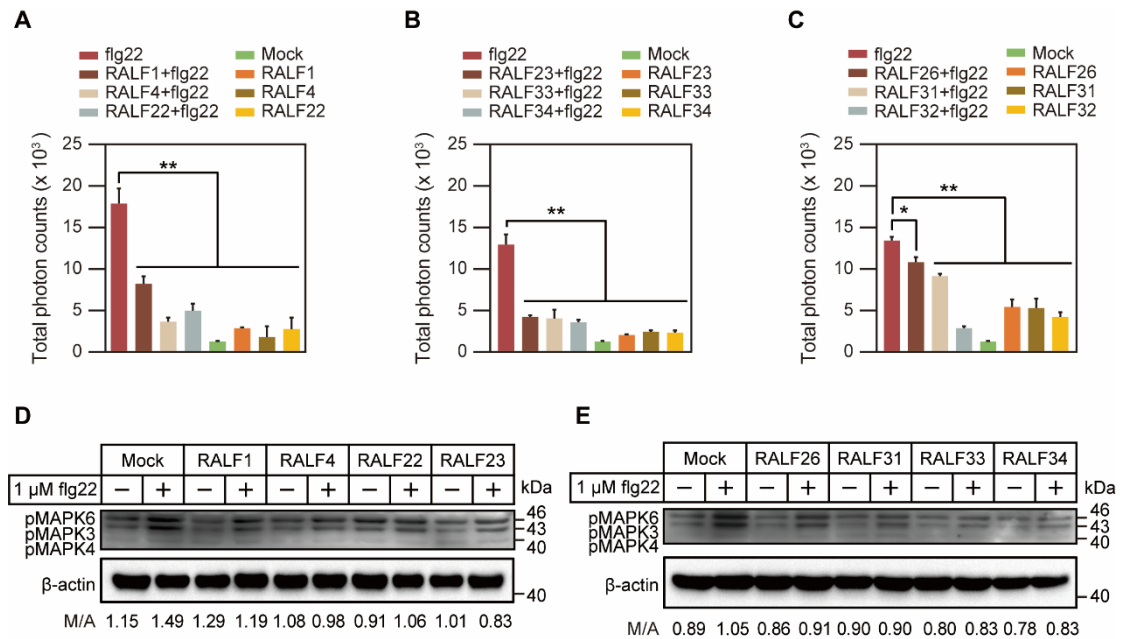

### Appendix Figure S6. Potential S1P-cleaved RALF peptides inhibit flg22-induced PTI.

(A-C) RALFs inhibited flg22-induced ROS production in Col-0 leaves. Four-week-old leaves of Col-0 were treated with water, 1  $\mu$ M flg22, 1  $\mu$ M RALF or both flg22 and RALF. ROS levels were then determined. The data shown indicate total ROS counts during a 30 mins period  $\pm$  SEs ( $n = 3$ ,  $n$  refers to technical replicates). \*,  $p < 0.05$ ; \*\*,  $p < 0.01$  (one-way ANOVA).

(D-E) RALFs inhibit flg22-induced MAPK activation. Seven-day-old seedlings of Col-0 were treated with water, 1  $\mu$ M flg22, 1  $\mu$ M RALF or both flg22 and RALF for 15 mins. The MAPK level was determined with anti-pMAPK, and  $\beta$ -actin was used as a loading control.

Data information: All experiments were repeated three times with similar results.

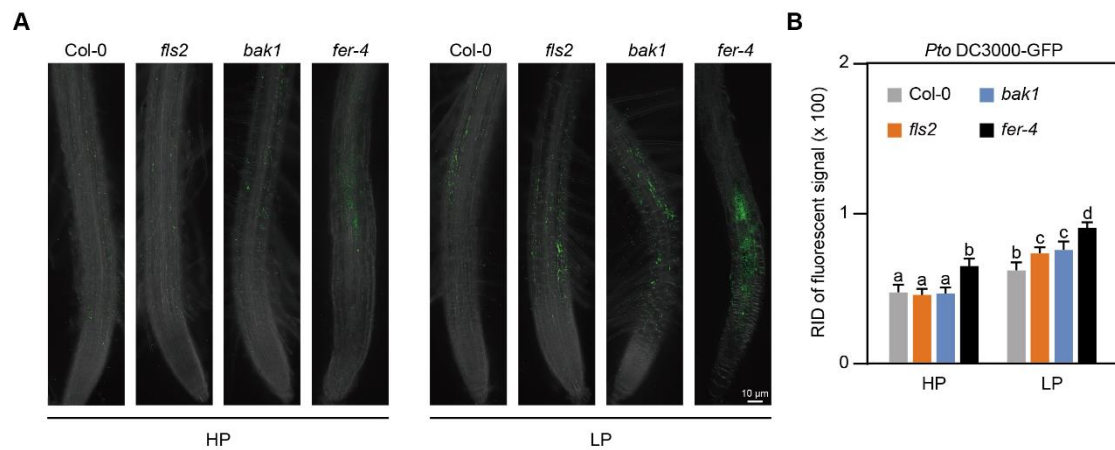

**Appendix Figure S7. The FLS2-BAK1 pathway regulates the growth of *Pto* DC3000 under Pi-starvation condition.**

(A) Col-0, *fls2*, *bak1* and *fer-4* mutants seedlings grown in either HP or LP media were inoculated (by soaking) with a GFP-labelled *Pto* DC3000 suspension ( $OD_{600} = 0.2$ ) for 2 min. The number of bacteria from individual root was quantified at 3 dpi and the fluorescence was checked in the root tip. One representative root was shown.

(B) The fluorescence intensity was quantified with ImageJ. The data shown indicate the means  $\pm$  SDs ( $n = 30$ ,  $n$  refers to the number of roots per group). Different lowercase letters indicate statistical significance (one-way ANOVA).

Data information: All experiments were repeated three times with similar results.

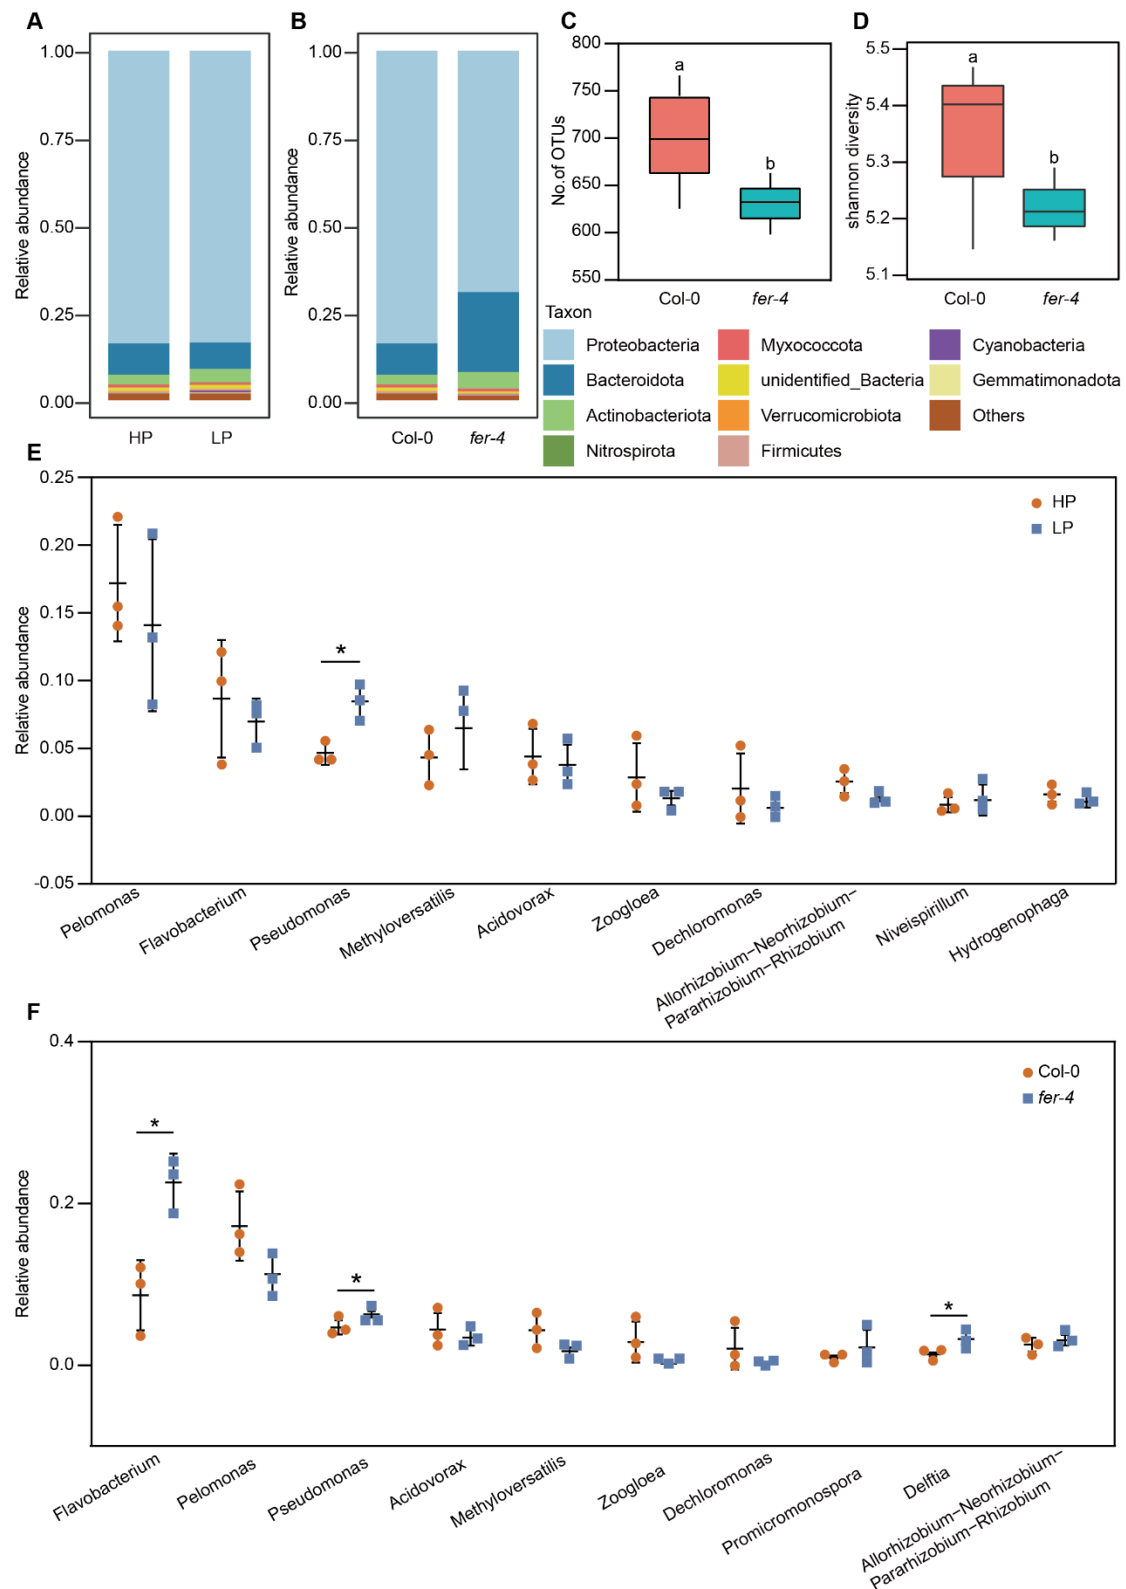

**Appendix Figure S8. LP treatment recruits specific rhizosphere microbiome.**

(A) Relative abundance of bacteria phyla in rhizosphere samples under HP or LP conditions (n = 3, n refers to biological replicates).

(B) Relative abundance of bacteria phyla in Col-0 or *fer-4* rhizosphere samples (n = 3, n refers to biological replicates).

(C) Number of OTUs in Col-0 or *fer-4* rhizosphere samples (n = 3, n refers to biological replicates). The different lowercase letters indicate statistical significance (Student's *t* test).

(D) Shannon diversity indexes in Col-0 or *fer-4* rhizosphere samples (n = 3, n refers to biological replicates). The different lowercase letters indicate statistical significance (Student's *t* test).

(E) Relative abundance of bacteria genera in rhizosphere samples under HP or LP conditions (n = 3, n refers to biological replicates). \*,  $p < 0.05$  (Student's *t* test).

(F) Relative abundance of bacteria genera in Col-0 or *fer-4* rhizosphere samples under HP conditions (n = 3, n refers to biological replicates). \*,  $p < 0.05$  (Student's *t* test).

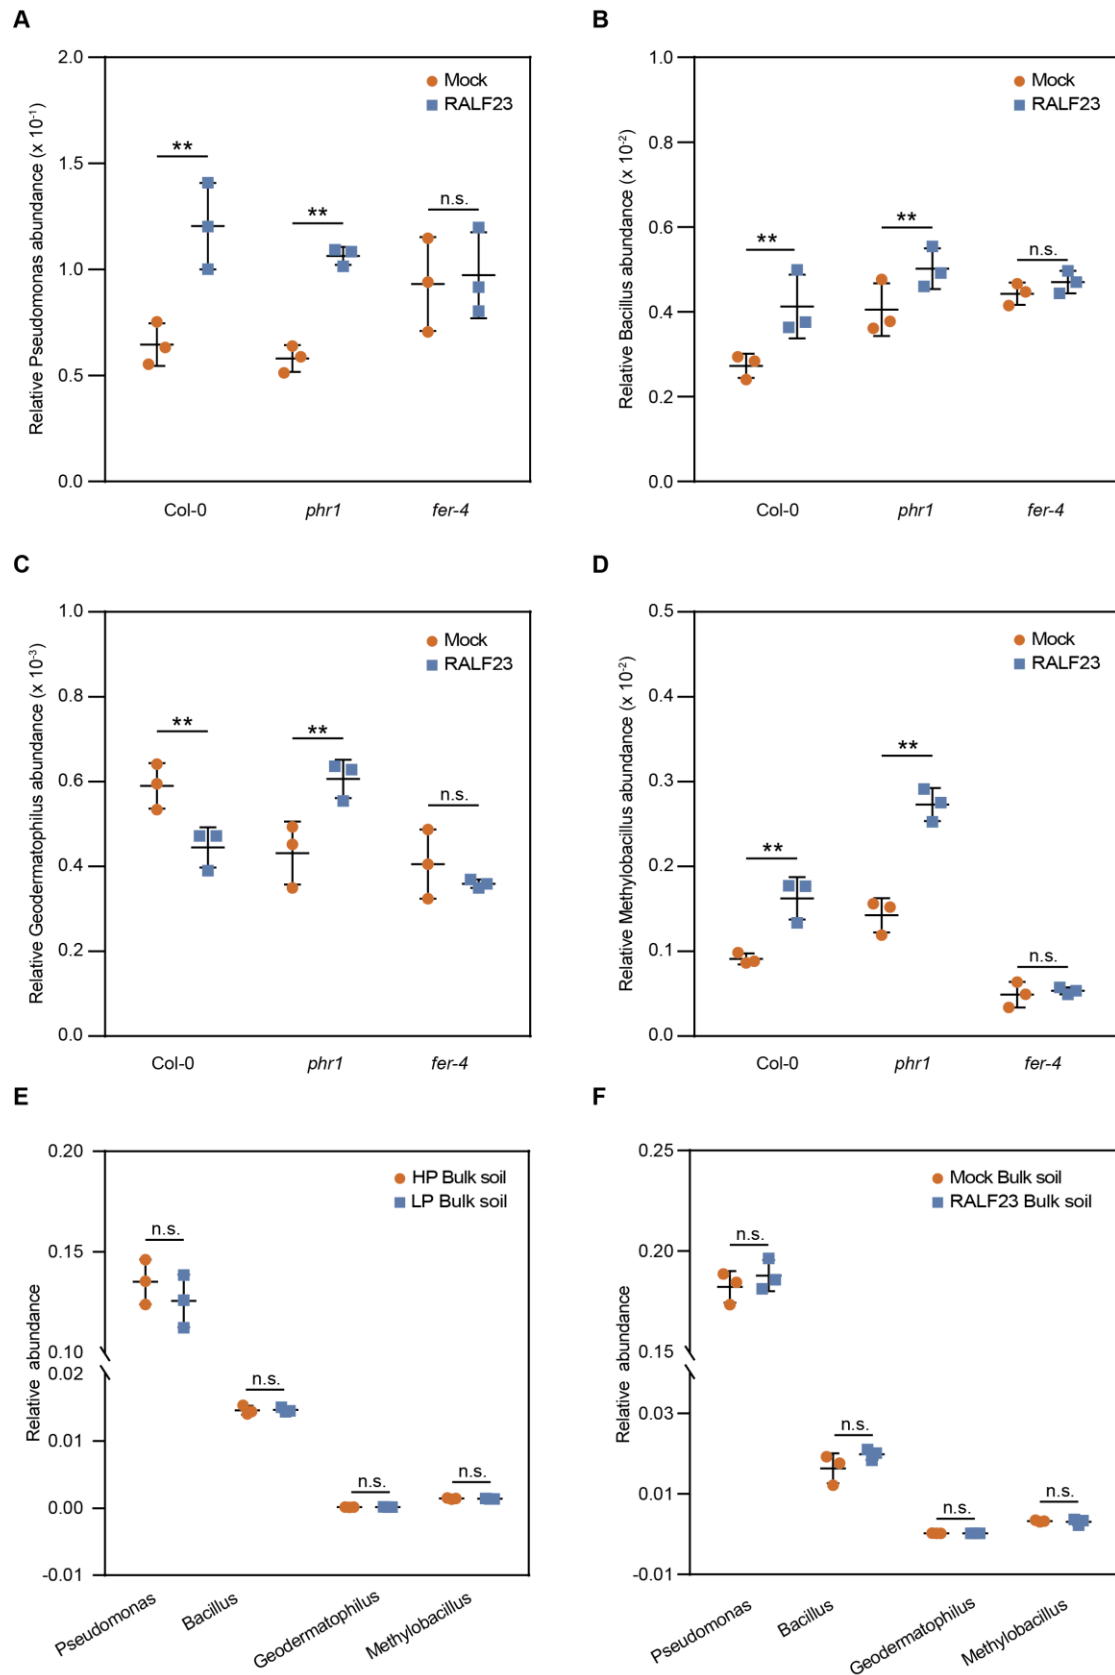

**Appendix Figure S9. RALF23 promotes the bacterial abundance under Pi-sufficient conditions.**

(A-D) Relative *Pseudomonas* (A), *Bacillus* (B), *Geodermatophilus* (C) and *Methylobacillus* (D) abundance in rhizosphere samples after treatment with *B. subtilis* expressing empty vector (Mock) or RALF23 (RALF23) under Pi sufficient conditions (n = 3 biological replicates). n.s., not significant; \*,  $p < 0.05$ , \*\*,  $p < 0.01$  (Student's *t* test).

(E-F) Relative *Pseudomonas*, *Bacillus*, *Geodermatophilus* and *Methylobacillus* abundance in bulk soil sample after LP treatment (E) or treatment with *B. subtilis* expressing RALF23 (RALF23) (n = 3, n refers to biological replicates) (F). n.s., not significant (Student's *t* test).

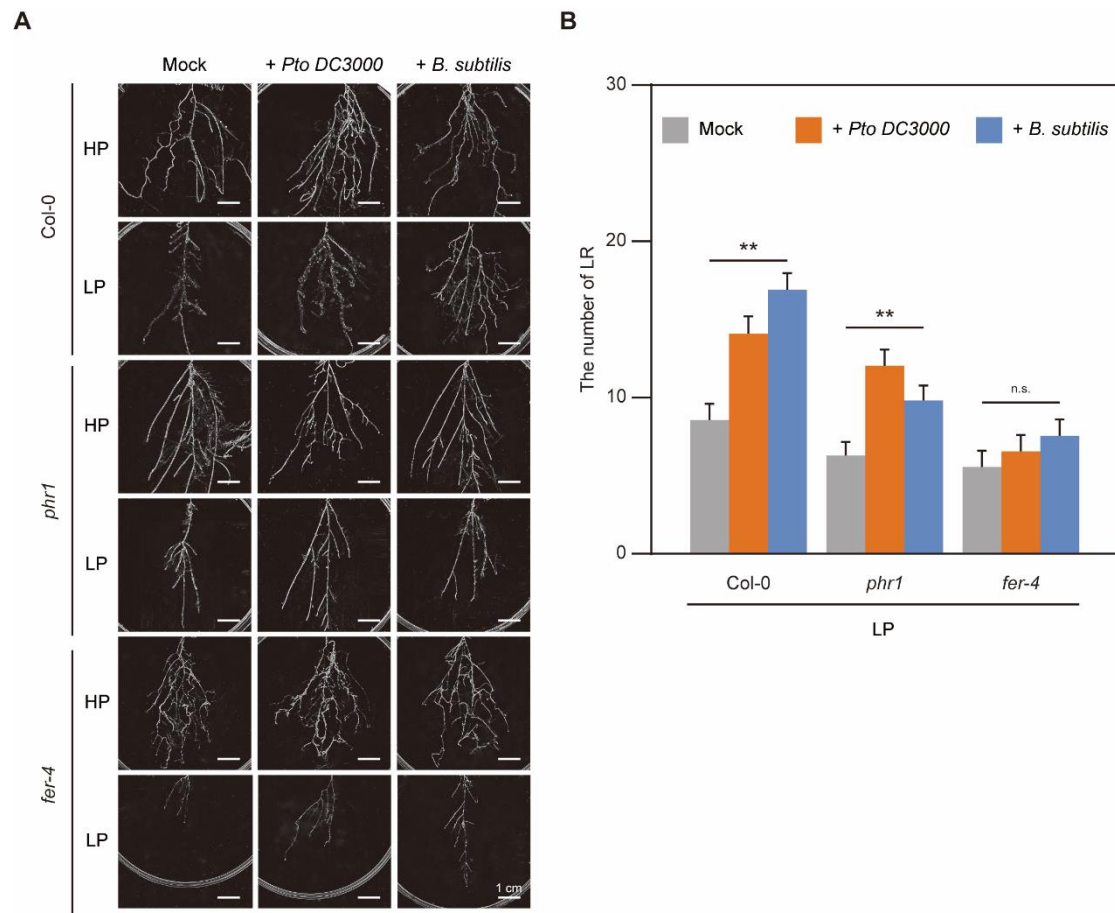

**Appendix Figure S10. Bacterial colonization promotes LR growth.**

(A-B) *Arabidopsis* seeds were germinated on 1/2-strength MS media for 3 days and then transplanted to either HP or LP media for another 5 days. The seedlings were then transferred to vermiculite and inoculated with *Pto DC3000* or *B. subtilis*. The roots were imaged 4 weeks after inoculation to analyze their morphology (A). The number of LR (lateral root) under LP condition was analyzed (B). The data shown indicate the means  $\pm$  SDs ( $n = 10$ ,  $n$  refers to the number of seedlings per group). n.s., not significant; \*\*,  $p < 0.01$  (Student's  $t$  test).

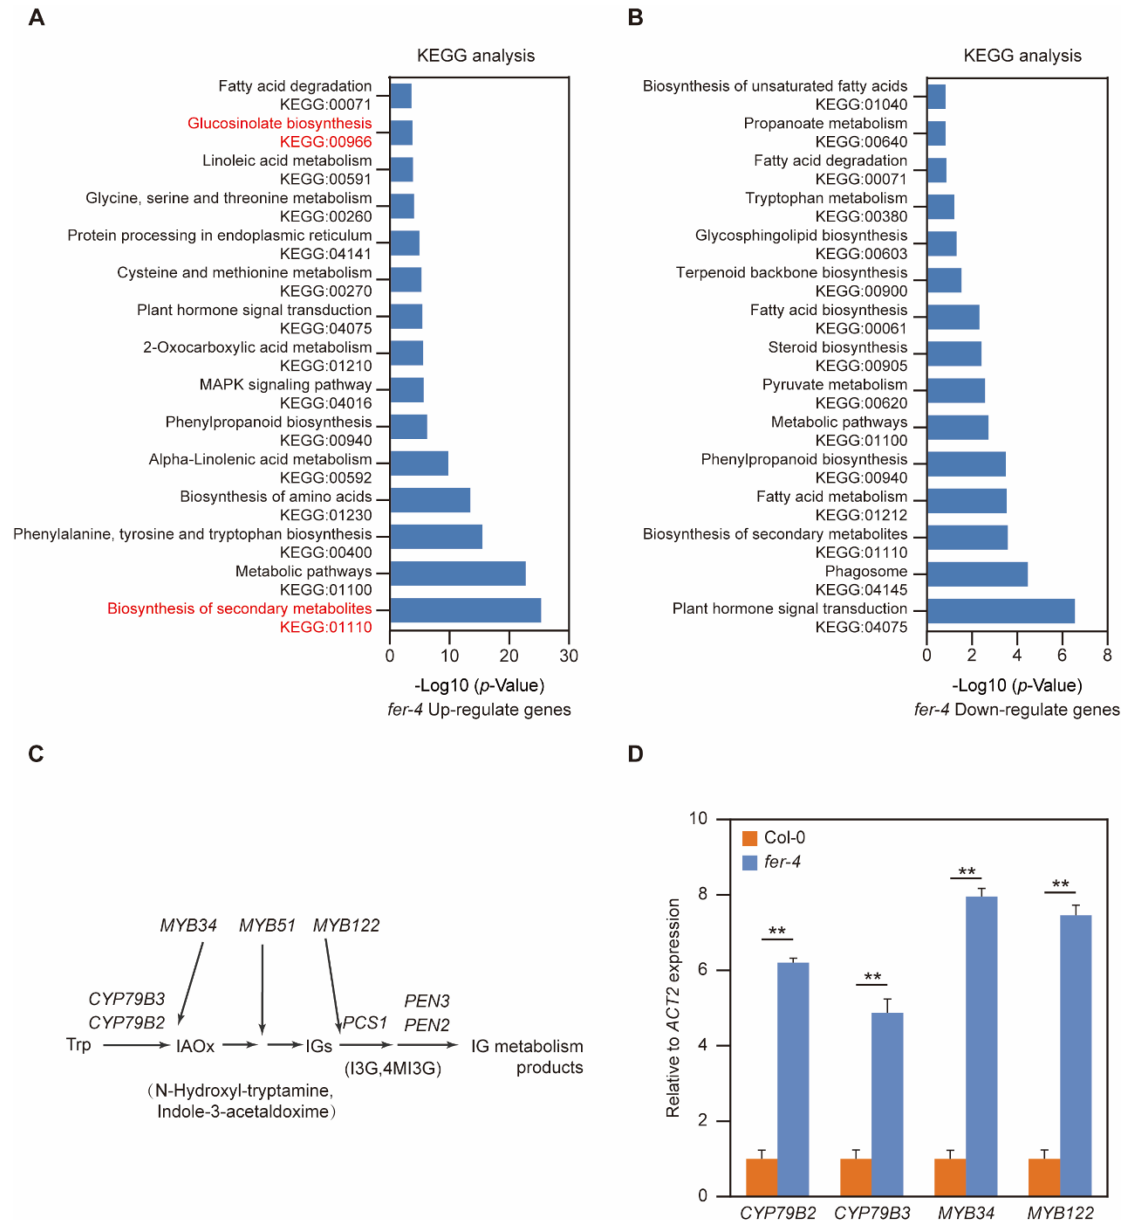

**Appendix Figure S11. FER is involved in regulation of Trp-derived glucosinolates metabolites synthesis.**

(A-B) KEGG enrichment analysis of (A) up-regulated genes and (B) down-regulated genes in *fer-4* mutants compare to Col-0.

(C) Trp-derived glucosinolates metabolite pathways in *A. thaliana*.

(D) The FER inhibits glucosinolates metabolite genes expression. Col-0 and *fer-4* mutants seedlings were grown in HP media for 5 days. Roots were harvested, and the relative expression of glucosinolates biosynthesis genes was quantified via RT-qPCR. The data shown indicate the means  $\pm$  SDs ( $n = 3$ ,  $n$  refers to technical replicates); \*\*,  $p < 0.01$  (Student's  $t$  test).

**Appendix Table S1 qPCR Primers**

| Protein   | Sequence 5'-3'                |
|-----------|-------------------------------|
| PHL1-F    | AGCCACCTGTTTCCACCG            |
| PHL1-R    | CCAATCTTGCCATTCACTTT          |
| WRKY6-F   | CCGCCTCCTAATGGTTCCA           |
| WRKY6-R   | TGCATCAGTGAGTTGTGGTTGTT       |
| WRKY45-F  | GTTTCATGGGGTTCGACAACT         |
| WRKY45-R  | CTGCTTTTTGGCCGTA CTTC         |
| WRKY75-F  | CAAGGAGCCAAGTGGATATTCT        |
| WRKY75-R  | CTCCTAGGGA ACTTGTGTCTT        |
| PHT1;1-F  | GGTTCCTATATGCGGCTCAA          |
| PHT1;1-R  | GCTAACCTCAGCCTCACCAG          |
| PHT1;3-F  | GGTCTACGTGCCATGGAATATC        |
| PHT1;3-R  | CTGCGTCTGTCTTGGTCTTATC        |
| PHT1;4-F  | TGATAAGCTCGGGAGGAAGA          |
| PHT1;4-R  | TGGTTGCGGATAAAGGGTAG          |
| PHT1;5-F  | CGCCGATATCCCATGACAAG          |
| PHT1;5-R  | GACCTAATGCGACGACGTTTG         |
| PHT1;6-F  | ACGTTATACATCATGGCAGGAATCAAT   |
| PHT1;6-R  | AAGCTCCTCAAGTGATTTCCCATTAGT   |
| PHT1;7-F  | TGGAGGATATCCATGCTCTGTCT       |
| PHT1;7-R  | CGCGGCTTCTGGAAAATTAG          |
| PHT1;8-F  | TTACCCGAAGTAAACCGTATGAGAA     |
| PHT1;8-R  | AATACGTCACCAAGATTCCAGCAA      |
| PHT1;9-F  | TGCAAAGAGTCATGTCCGTATC        |
| PHT1;9-R  | CGGCGAGAGAAGAGTTTGTATG        |
| FRK1-F    | TATATGGACACCGCGTATAGTG        |
| FRK1-R    | ATAAAACTTTGCGTTAGGGTCG        |
| PER5-F    | GAGACGCTTCTGAATACG            |
| PER5-R    | GTCGATGTCGCTTGAGTT            |
| MYB51-F   | AATGACAAGGCGAAGAAG            |
| MYB51-R   | GAGGTTGGTGCGAAGGAA            |
| HEL-F     | GGTGGTTCGA ACTTGTCCC          |
| HEL-R     | ACGGCTTATCAGCATCCC            |
| RALF1-F   | CTTACGATTCTCGTCGTCTTCATCATCTC |
| RALF1-R   | CGTGGCAGCCTGAACCATTGTCT       |
| RALF4-F   | ACAAACCGTCGTCAACTC            |
| RALF4-R   | ATCATTTAGCGAGCGTAC            |
| RALF22-F: | TTCGGAGATTGCTAGATTTTCGTGAG    |
| RALF22-R  | TCAACGCCTGCACCTAGTGATGGT      |
| RALF23-F  | TCCATCTTTCAGTGGCATT           |
| RALF23-R  | GGCGACGGACCAGTTATG            |
| RALF33-F  | TCGCCGCCGTAACCTCCCAATC        |

|           |                              |
|-----------|------------------------------|
| RALF33-R  | ACGCCTGTTGATCTCAGAGTCCATCTCG |
| RALF34-F  | CTTCTTCGCTCTAGTTTCC          |
| RALF34-R  | CGTCGTCTTCCTCCGTAA           |
| CYP79B3-F | CAATCAAGAGGCTTATGTTTCGG      |
| CYP79B3-R | TAGATCCAATCCCGTAAGCATC       |
| CYP79B2-F | GAAAGTTGTGATGACGGAAGTC       |
| CYP79B2-R | GCATTTCCACAGTAATGCCTAG       |
| MYB34-F   | TAGCTTGGCGGGACGAAC           |
| MYB34-R   | CCTAGCGGAACCGGATGA           |
| MYB122-F  | ATGGTGAAGGCGGTTGGC           |
| MYB122-R  | TGAATGGCGTGGAGGTTG           |
